# Supplementary material for: Survival Rates of Microbial Communities from Livestock Waste to Soils: A Comparison between Compost and Digestate
Source: Hindawi journal article supplement (doi:10.1155/2021/6645203), 2021-01-29
Supplement: f1 [file 6645203.f1.docx]

**Title**

Survival rates of microbial communities from livestock waste to soils —a comparison between

compost and digestate

**Names of the authors**

Maiko Akari1 and Yoshitaka Uchida2

**Affiliations**

1Graduate School of Global Food Resources, Hokkaido University, Kita 9, Nishi 10, Kita-ku, Sapporo, Hokkaido 060-0809, Japan.

2Research Faculty of Agriculture, Hokkaido University, Kita 9, Nishi 9, Kita-ku, Sapporo, Hokkaido 060-8589, Japan.

**Email address of the corresponding author**

Y. Uchida: [uchiday@chem.hokudai.ac.jp](mailto:uchiday@chem.hokudai.ac.jp)

**
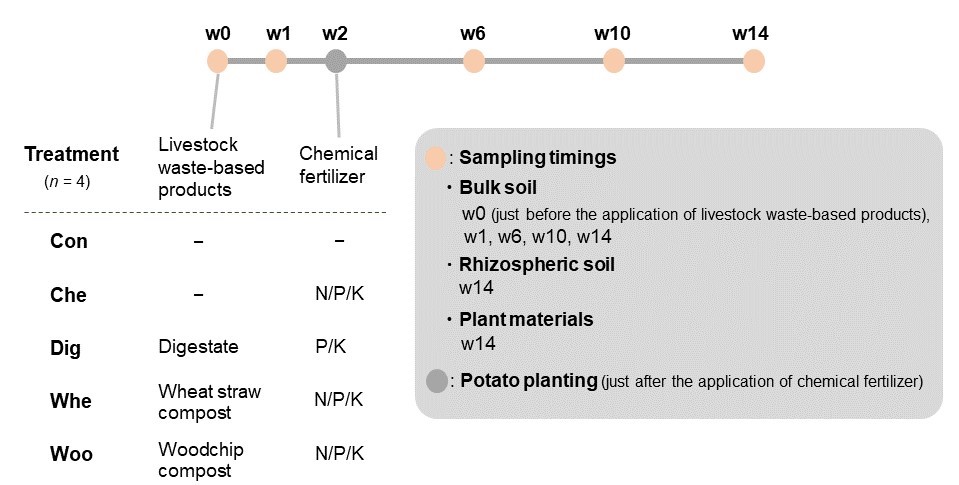
**

Figure S1**:** Experimental Design. Livestock waste-based products (digestate, wheat straw compost, and woodchip compost) were applied to three treatments (Dig, Whe, and Woo) on week 0. After 2 weeks of the application, chemical fertilizer was applied to all treatments except Con, and potato seed (*Solanum tuberosum*) was planted to all treatments. Bulk soil was sampled on 0 (just before the application), 1, 6, 10, and 14 weeks after the application. Rhizospheric soil and plant materials were sampled on week 14.


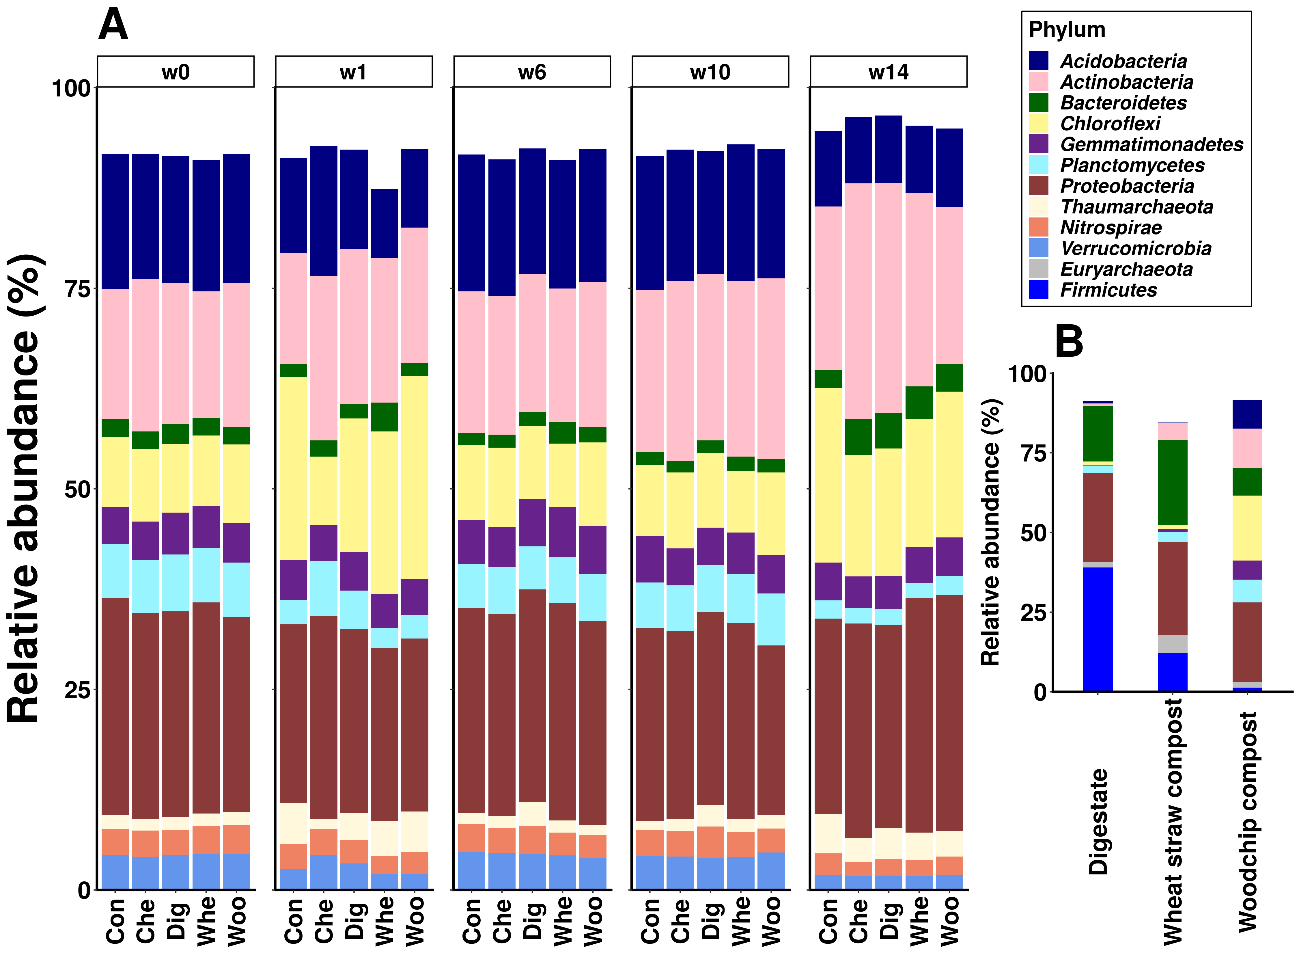


Figure S2: Relative abundance of microbial phyla detected in (A) sampled soils (*n* = 4) and (B) livestock waste-based product sources (digestate, wheat straw compost, and woodchip compost) (*n* = 3). Vertical bar chart was obtained by averaging the relative abundance across the biological replicates for each sample and by cutting phylum whose relative abundance was less than 2% × number of samples. In (A), data are divided by sampling time: w0, week 0; w1, week 1; w6, week 6; w10, week 10; w14, week 14.


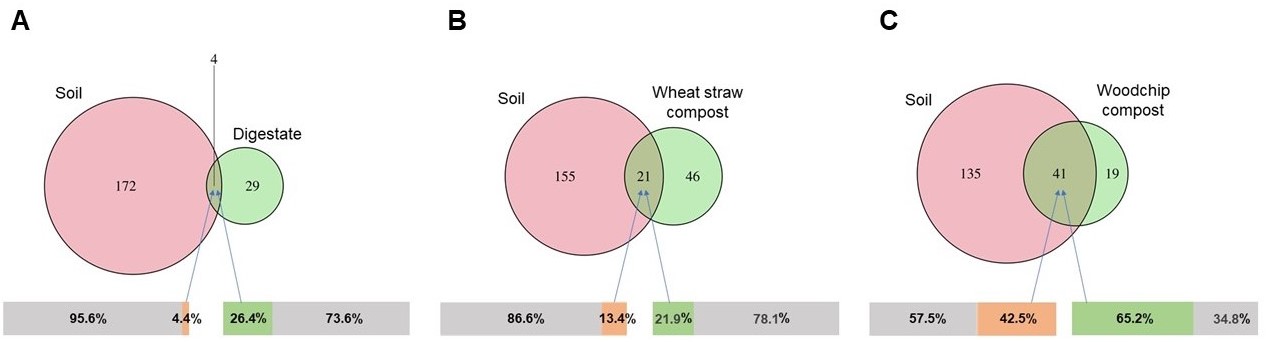


Figure S3: Venn diagrams of the number of shared and unique family numbers between (A) the original soil and the digestate, (B) the original soil and the wheat straw compost, and (C) the original soil and the woodchip compost. The families with the relative abundance of more than 1% were used for this analysis. The bar figures below the Venn diagrams express the relative abundance of the “shared families (colored)” and “unique families or families less than 1% (gray)”, within the whole bacterial abundance.


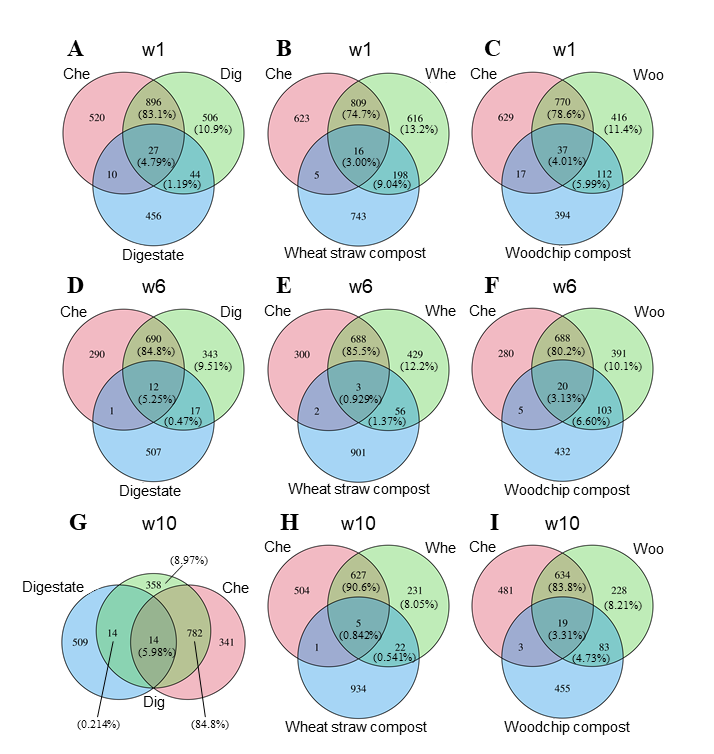


Figure S4: Venn diagrams of the number of shared and unique OTU numbers among (A) Che, Dig, and digestate, (B) Che, Whe, and wheat straw compost, and (C) Che, Woo, and woodchip compost on week 1. Same group of the treatments on different timings are shown in D, E, and F (week 6) and in G, H, and I (week 10). The values in the brackets (percentage values) are the relative abundances within the total bacterial abundance in the Dig (A, D, and G), Woo (B, E, and H) and Whe (C, F, and I). The relative abundances of each OTU differ, thus the OTU number values and the percentage values are not proportional.


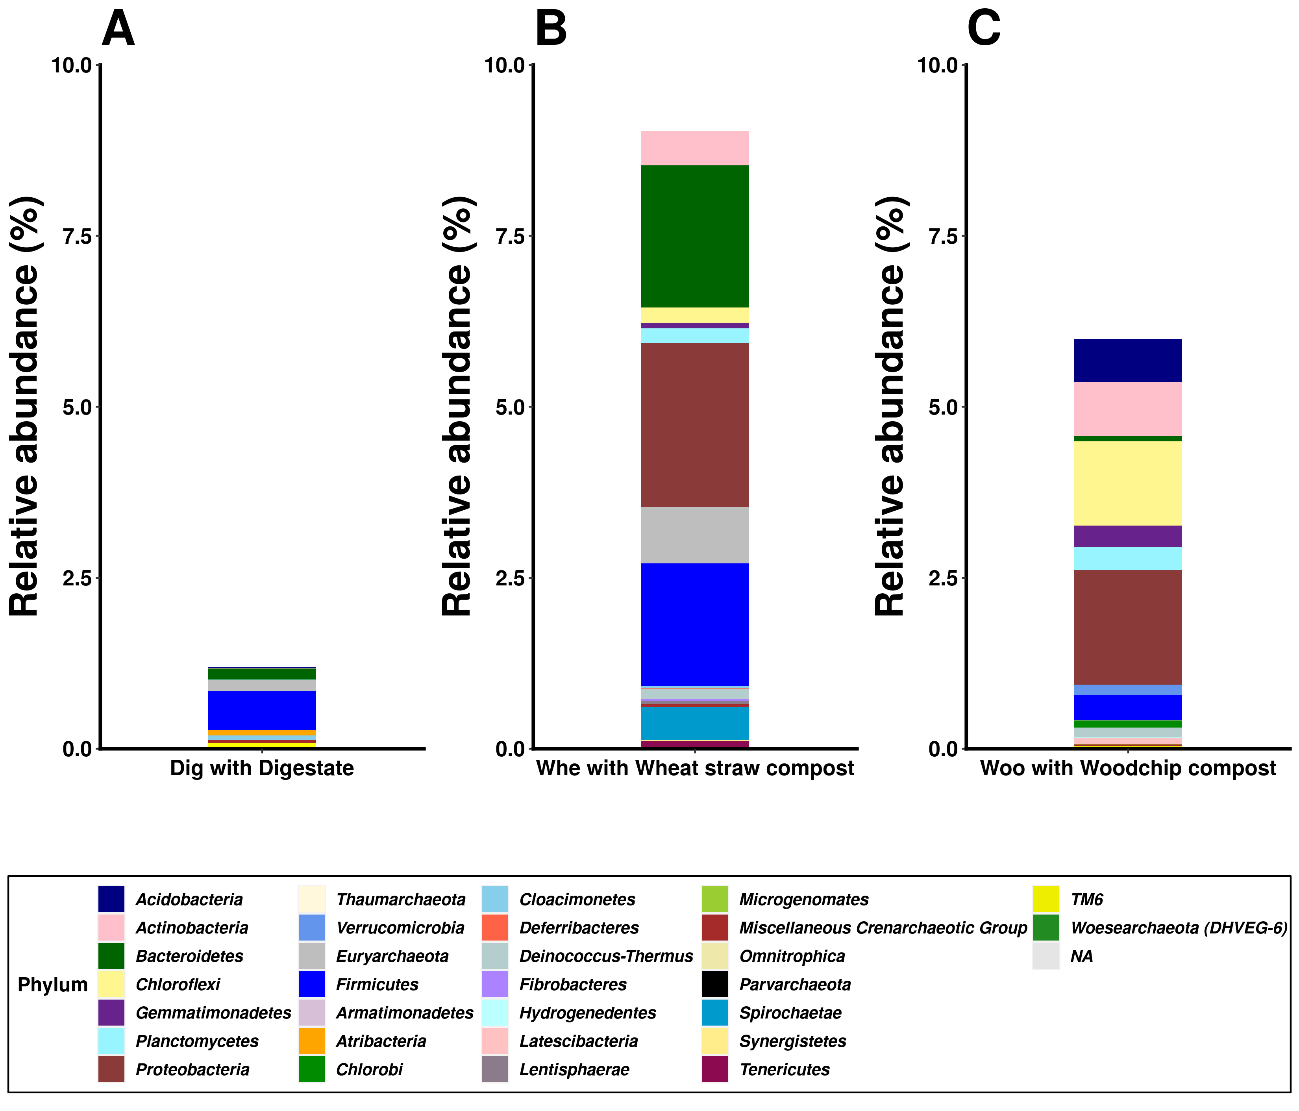


Figure S5: Relative abundance of microbial phyla shared between one of the treatments with livestock waste-based products (Dig, Whe, or Woo) and each original livestock waste-based product source (digestate, wheat straw compost, or woodchip compost) on week 1. The total percentage values for each bar are derived from A: 1.19% (shared between Dig and Digestate in Figure S4A), B: 9.04% (shared between Whe and Wheat straw compost in Figure S4B), and C: 5.99% (shared between Woo and Woodchip compost in Figure S4C). Vertical bar charts were obtained by averaging the relative abundance across the biological replicates for each sample (n = 4).

Table S1: Application rates of the nutrients (N/P/K) in each treatment from both chemical fertilizer and livestock waste-based products.


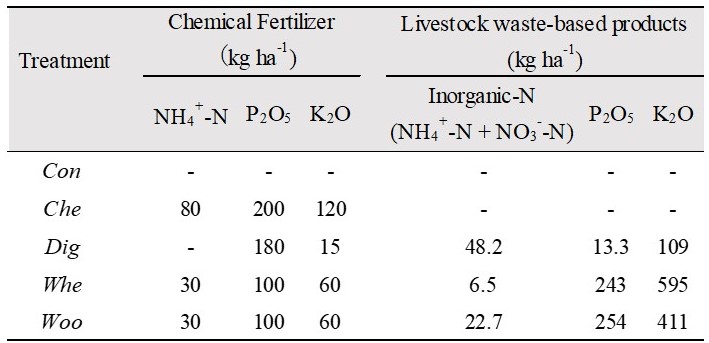


Table S2: Unique families observed in original digestate compared to original soil.


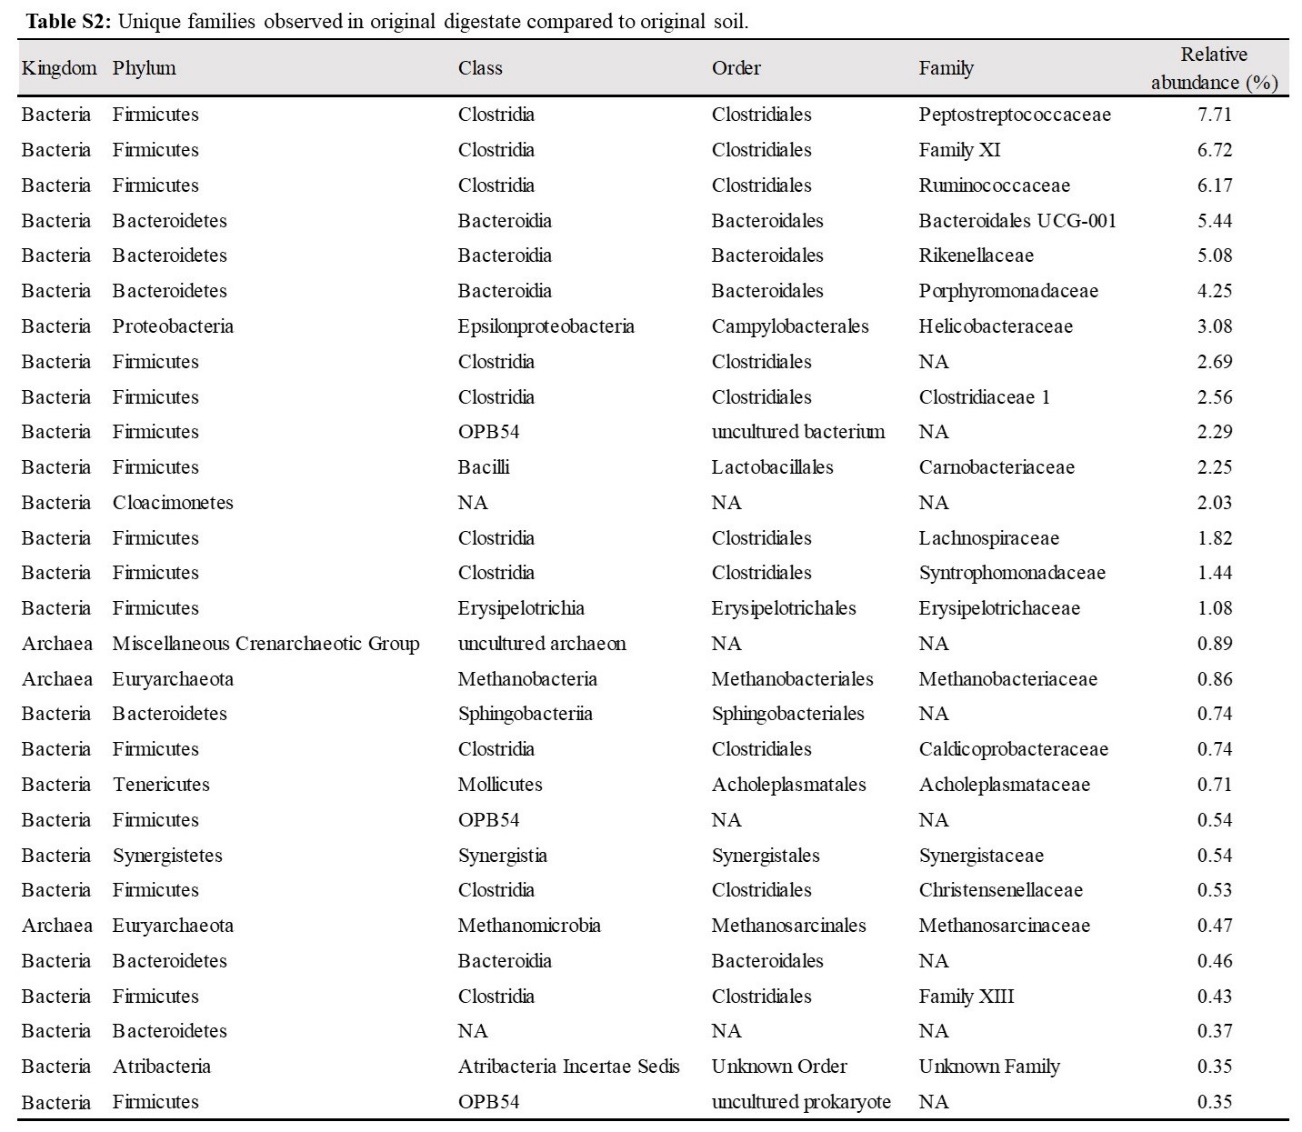


Table S3: Unique families observed in original wheat straw compost compared to original soil.


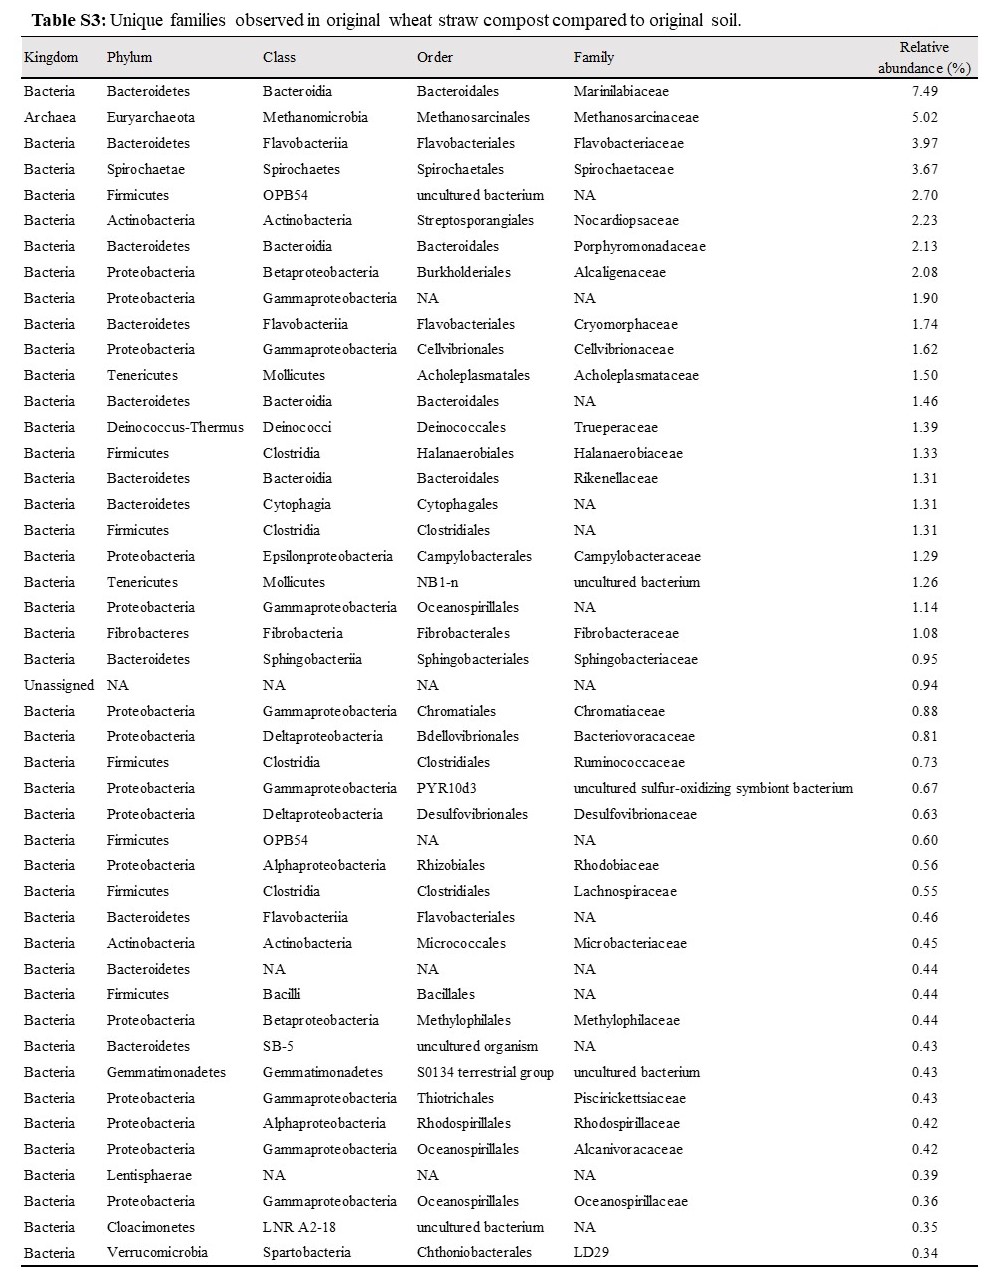


Table S4: Unique families observed in original woodchip compost compared to original soil.


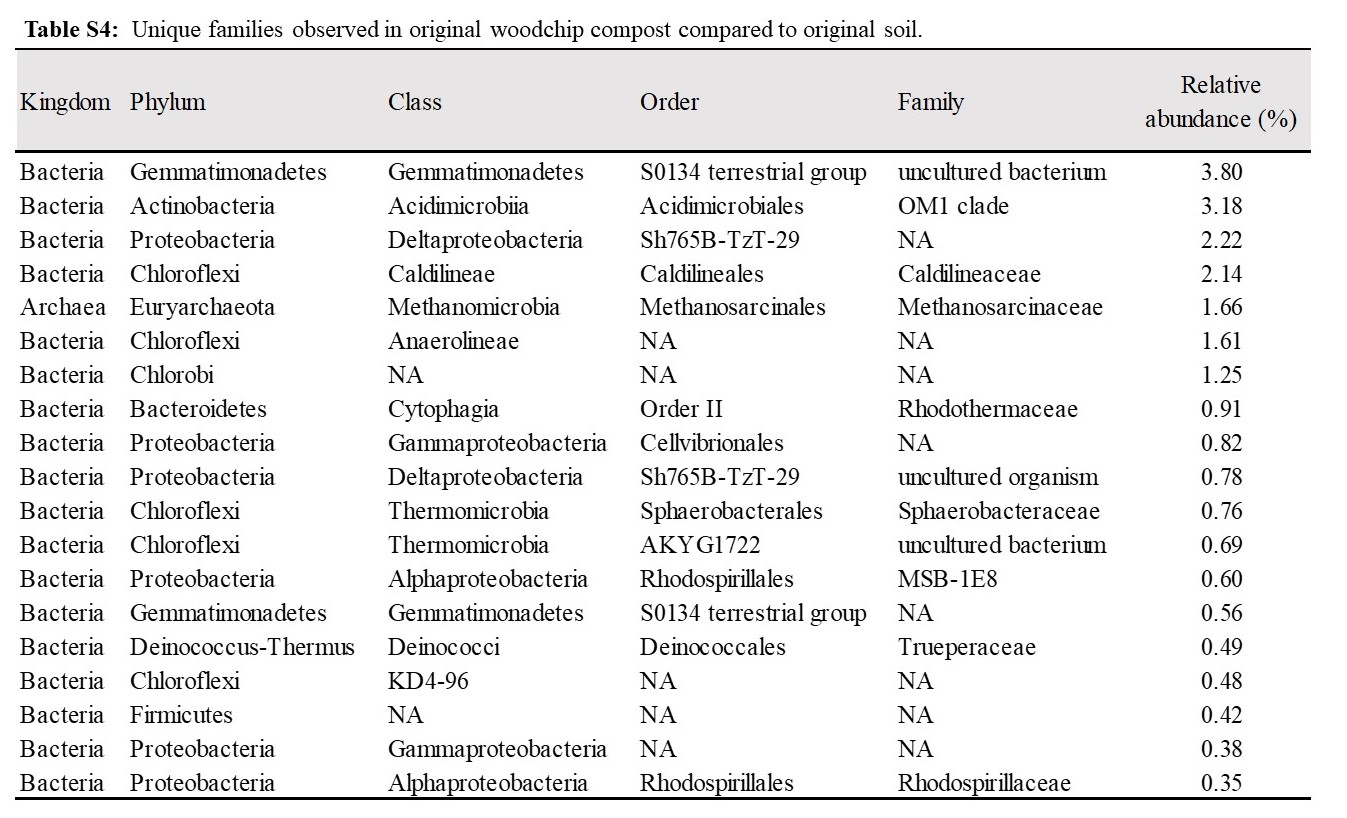


Table S5: OTUs significantly changed in Woo compared to Che on week 1.

Table S6: OTUs significantly changed in Woo compared to Che on week 6.

Table S7: OTUs significantly changed in Woo compared to Che on week 10.

Table S8: OTUs significantly changed in Whe compared to Che on week 1.
